# Supplementary material
Source: MDPI journal article supplement (https://www.mdpi.com/2225-1154/12/4/53)
Supplement: s1 [file s1]

# Key innovations in financing nature-based solutions for coastal adaptation

Fausto Favero <sup>1,2,\*</sup> and Jochen Hinkel <sup>1,2</sup>

<sup>1</sup> Resource Economics Group, Thae-Institute of Agricultural and Horticultural Sciences, Humboldt Universität zu Berlin, Berlin, Germany.

<sup>2</sup> Global Climate Forum e.V., Neue Promenade 6 10178 Berlin, Germany

\* Correspondence: fausto.favero@globalclimateforum.org

## Supplementary Materials

**Table S1.** Case study database, section 1.

| No.   | Case study title                                             | Country                                       | Type of NBS                                                  | Project Size <sup>1</sup> | Project status    |
|-------|--------------------------------------------------------------|-----------------------------------------------|--------------------------------------------------------------|---------------------------|-------------------|
| CS1   | Zandmaas and Grensmaas public works projects - Delta Program | Netherlands                                   | Coastal adaptation                                           | Large                     | 2019, Implemented |
| CS 2  | Seychelles Blue bond                                         | Seychelles                                    | Coastal ecosystem conservation                               | Medium                    | 2018, Implemented |
| CS 3  | Nordic-Baltic Blue Bond                                      | Denmark, Finland, Iceland, Norway, and Sweden | Coastal ecosystems conservation and restoration              | Large                     | 2019, Implemented |
| CS 4  | Arkansas Water Utility Green Bond                            | USA                                           | Watershed management                                         | Large                     | 2020, Implemented |
| CS 5  | DC Water EIB                                                 | USA                                           | Stormwater management                                        | Large                     | 2016, Implemented |
| CS 6  | Hampton EIB                                                  | USA                                           | Stormwater management                                        | Medium                    | 2020, Implemented |
| CS 7  | Buffalo EIB                                                  | USA                                           | Stormwater management                                        | Large                     | 2021, Implemented |
| CS 8  | Atlanta EIB                                                  | USA                                           | Stormwater management                                        | Medium                    | 2020, Implemented |
| CS 9  | Louisiana EIB                                                | USA                                           | Coastal adaptation, Coastal ecosystem restoration (Wetlands) | Large                     | 2017, Withdrawn   |
| CS 10 | Yuba Forest Resilience Bond                                  | USA                                           | Reforestation                                                | Medium                    | 2018, Implemented |
| CS 11 | Deshkan Ziibi Conservation Impact Bond Project               | Canada                                        | Ecosystem conservation                                       | Small                     | 2019, Implemented |
| CS 12 | Rhino Impact Investment Project                              | South Africa                                  | Ecosystem conservation                                       | Large                     | 2021, Implemented |

|       |                                                                      |                                                                 |                                                               |               |                   |
|-------|----------------------------------------------------------------------|-----------------------------------------------------------------|---------------------------------------------------------------|---------------|-------------------|
| CS 13 | Aotearoa permanent forest bond                                       | New Zealand                                                     | Reforestation                                                 | Large         | Planned           |
| CS 14 | Fondo Acción (Fondo para la Acción Ambiental y la Niñez)             | Colombia                                                        | Ecosystem conservation, sustainable agriculture               | Large         | 2000, Implemented |
| CS 15 | Climate Fund for Madagascar Climate and Conservation Investment Fund | Madagascar                                                      | Ecosystem conservation, reforestation                         | Large         | 2016, Implemented |
| CS 16 | Sustainable Ocean Fund                                               | Focus areas in Latin America and the Caribbean, Africa and Asia | Coastal ecosystem conservation                                | Large         | 2017, Implemented |
| CS 17 | Meloy Fund                                                           | Indonesia, Philippines                                          | Coastal ecosystem conservation                                | Large         | 2017, Implemented |
| CS 18 | Regen Network                                                        | Various                                                         | Forest conservation                                           | Not mentioned | 2017, Implemented |
| CS 19 | GainForest                                                           | Various                                                         | Forest conservation                                           | Not mentioned | 2019, Implemented |
| CS 20 | FLRChain                                                             | Uganda                                                          | Reforestation                                                 | Not mentioned | 2021, Implemented |
| CS 21 | Project Genesis 2.0                                                  | Hong Kong                                                       | Forest conservation, reforestation                            | Not mentioned | 2022, Planned     |
| CS 22 | Papariko Blue Carbon project                                         | Kenya                                                           | Coastal Adaptation, coastal ecosystem restoration (Mangroves) | Large         | 2021, Implemented |
| CS 23 | BioTokens                                                            | Australia                                                       | Ecosystem Conservation                                        | Not mentioned | 2017, Implemented |
| CS 24 | Treecycle                                                            | Paraguay                                                        | Reforestation                                                 | Large         | 2018, Implemented |
| CS 25 | PPP for sand nourishment in Pevensey Bay                             | United Kingdom                                                  | Coastal adaptation, sand nourishment                          | Large         | 2000, Implemented |
| CS 26 | Oxcley Creek green corridor                                          | Australia                                                       | Ecosystem restoration                                         | Large         | 2018, Implemented |
| CS 27 | Tweed Sand Bypass                                                    | Australia                                                       | Coastal adaptation, sand nourishment                          | Large         | 2000, Implemented |
| CS 28 | Zorrotzaurre district redevelopment                                  | Spain                                                           | Watershed management, Stormwater management                   | Large         | 2016, Implemented |
| CS 29 | Hybrid flood management, the Norfolk Broadlands                      | United Kingdom                                                  | Watershed management, Stormwater management                   | Large         | 2001, Implemented |

|       |                                                        |                     |                                                                                |        |                   |
|-------|--------------------------------------------------------|---------------------|--------------------------------------------------------------------------------|--------|-------------------|
| CS 30 | Mikoko Pamoja                                          | Kenya               | Coastal adaptation, coastal ecosystem restoration (Mangroves)                  | Small  | 2012, Implemented |
| CS 31 | Vlinder Myanmar Blue Carbon                            | Myanmar             | Coastal Adaptation, coastal ecosystem restoration (Mangroves)                  | Large  | 2020, Implemented |
| CS 32 | Markets and Mangroves Project                          | Vietnam             | Coastal Adaptation, coastal ecosystem restoration (Mangroves)                  | Large  | 2012, Implemented |
| CS 33 | Blue forests Madagascar                                | Madagascar          | Coastal Adaptation, coastal ecosystem conservation (Mangroves)                 | Large  | 2016, Implemented |
| CS 34 | Yokohama Blue Carbon Project                           | Japan               | Coastal Adaptation, coastal ecosystem restoration (Seagrass)                   | Medium | 2015, Implemented |
| CS 35 | Fukuoka Blue Carbon Project                            | Japan               | Coastal Adaptation, coastal ecosystem restoration (Seagrass)                   | Medium | 2015, Implemented |
| CS 36 | J-Blue Project                                         | Japan               | Coastal Adaptation, coastal ecosystem restoration (Seagrass)                   | Medium | 2015, Implemented |
| CS 37 | Forested Wetland Assimilation in the Mississippi Delta | USA                 | Coastal adaptation, coastal ecosystem restoration (Wetlands)                   | Large  | 2012, Withdrawn   |
| CS 38 | Vida Manglar Blue Carbon Project                       | Colombia            | Coastal adaptation, coastal ecosystem restoration (Mangroves)                  | Large  | 2012, Implemented |
| CS 39 | Miro Forestry                                          | Ghana, Sierra Leone | Reforestation                                                                  | Large  | 2020, Implemented |
| CS 40 | India Sundarbans Mangrove Restoration Project          | India, Bangladesh   | Coastal Adaptation, coastal ecosystem restoration (Mangroves)                  | Large  | 2010, Implemented |
| CS 41 | Selva Shrimp Kalimantan                                | Indonesia           | Coastal Adaptation, coastal ecosystem restoration and conservation (Mangroves) | Large  | 2013, Implemented |
| CS 42 | Galapagos National Park user fees                      | Ecuador             | Marine ecosystem conservation                                                  | Medium | 1998, Implemented |
| CS 43 | Bonaire Marine Park scuba diving fees                  | Netherlands         | Marine ecosystem conservation                                                  | Small  | 1992, Implemented |
| CS 44 | International Visitor Conservation and                 | New Zealand         | Ecosystem conservation                                                         | Medium | 2019, Implemented |

| Tourism Levy  |                                                       |                   |                                                    |              |                   |
|---------------|-------------------------------------------------------|-------------------|----------------------------------------------------|--------------|-------------------|
| Environmental |                                                       |                   |                                                    |              |                   |
| CS 45         | preservation fee in Bombinhas, Santa Catarina         | Brazil            | Coastal adaptation, coastal ecosystem conservation | Small        | 2013, Implemented |
| CS 46         | Beach nourishments in North Carolina                  | USA               | Coastal adaptation, sand nourishment               | Medium/Large | 2005, Implemented |
| CS 47         | Measures against coastal erosion in Sirolo and Numana | Italy             | Coastal adaptation, Sand nourishment               | Large        | 2020, Implemented |
| CS 48         | The "Carnes del Pastizal" label                       | Argentina, Brazil | Ecosystem conservation                             | Small        | 2010, Implemented |

\* Small size: < US\$ 1 million, medium size: < US\$ 20 million, large size: > US\$ 20 million.

**Table S2.** Case study database, section 2.

| No.   | Innovative financial solution |     |               |                 |          |               |           |                   |
|-------|-------------------------------|-----|---------------|-----------------|----------|---------------|-----------|-------------------|
|       | Green bond                    | EIB | Project bund. | Smart contracts | BC Token | Carbon credit | Eco-label | Ecotour. user fee |
| CS1   | x                             |     | x             |                 |          |               |           |                   |
| CS 2  | x                             |     | x             |                 |          |               |           |                   |
| CS 3  | x                             |     | x             |                 |          |               |           |                   |
| CS 4  | x                             |     | x             |                 |          |               | x         |                   |
| CS 5  |                               | x   |               |                 |          |               |           |                   |
| CS 6  |                               | x   |               |                 |          |               |           |                   |
| CS 7  |                               | x   |               |                 |          |               |           |                   |
| CS 8  | x                             | x   | x             |                 |          |               |           |                   |
| CS 9  |                               | x   |               |                 |          |               |           |                   |
| CS 10 |                               | x   | x             |                 |          |               |           |                   |
| CS 11 |                               | x   |               |                 |          |               |           |                   |
| CS 12 |                               | x   |               |                 |          |               |           |                   |
| CS 13 | x                             | x   |               |                 |          |               |           |                   |
| CS 14 |                               |     | x             |                 |          |               |           |                   |
| CS 15 | x                             |     | x             |                 |          |               |           |                   |
| CS 16 |                               |     | x             |                 |          |               | x         |                   |
| CS 17 |                               |     | x             |                 |          |               |           |                   |
| CS 18 |                               |     |               | x               | x        | x             |           |                   |
| CS 19 |                               |     |               | x               | x        |               |           |                   |
| CS 20 |                               |     | x             | x               |          |               |           |                   |
| CS 21 | x                             |     | x             | x               |          | x             |           |                   |
| CS 22 |                               |     | x             |                 | x        | x             |           |                   |
| CS 23 |                               |     | x             |                 | x        |               |           |                   |
| CS 24 |                               |     | x             |                 | x        |               |           |                   |
| CS 25 |                               |     |               |                 |          |               |           |                   |
| CS 26 |                               |     |               |                 |          |               |           |                   |
| CS 27 |                               |     |               |                 |          |               |           |                   |
| CS 28 |                               |     | x             |                 |          |               |           | x                 |
| CS 29 |                               |     | x             |                 |          |               |           |                   |
| CS 30 |                               |     |               |                 |          | x             |           |                   |

---

|       |   |   |   |
|-------|---|---|---|
| CS 31 | x | x | x |
| CS 32 |   |   | x |
| CS 33 |   | x |   |
| CS 34 |   | x |   |
| CS 35 |   | x | x |
| CS 36 |   | x |   |
| CS 37 |   | x |   |
| CS 38 |   | x | x |
| CS 39 |   | x | x |
| CS 40 | x | x |   |
| CS 41 | x |   | x |
| CS 42 |   |   | x |
| CS 43 |   |   | x |
| CS 44 |   |   | x |
| CS 45 |   |   | x |
| CS 46 |   |   | x |
| CS 47 |   |   | x |
| CS 48 |   | x |   |

---

**Table S3.** Case study database, section 3.

| No.   | Financial Barrier addressed        |                               |                              |                            |                                          |                    |                          |
|-------|------------------------------------|-------------------------------|------------------------------|----------------------------|------------------------------------------|--------------------|--------------------------|
|       | FB 1:<br>High<br>performance risks | FB 2:<br>Low<br>measurability | FB 3:<br>Site<br>specificity | FB 4:<br>Long lead<br>time | FB 5:<br>Insufficient<br>project<br>size | FB 6:<br>Jointness | FB 7:<br>Low<br>revenues |
| CS1   | x                                  | x                             |                              |                            | x                                        |                    |                          |
| CS 2  | x                                  | x                             |                              |                            | x                                        |                    |                          |
| CS 3  | x                                  | x                             |                              |                            | x                                        |                    |                          |
| CS 4  | x                                  | x                             |                              |                            | x                                        |                    |                          |
| CS 5  | x                                  |                               |                              |                            |                                          |                    |                          |
| CS 6  | x                                  |                               |                              |                            |                                          |                    |                          |
| CS 7  | x                                  |                               |                              |                            |                                          |                    |                          |
| CS 8  | x                                  | x                             |                              |                            |                                          |                    |                          |
| CS 9  | x                                  | x                             |                              |                            |                                          |                    |                          |
| CS 10 | x                                  | x                             |                              | x                          |                                          |                    |                          |
| CS 11 | x                                  |                               |                              |                            |                                          |                    |                          |
| CS 12 | x                                  |                               |                              |                            |                                          |                    |                          |
| CS 13 | x                                  |                               |                              |                            |                                          |                    |                          |
| CS 14 | x                                  |                               |                              |                            | x                                        |                    |                          |
| CS 15 | x                                  |                               |                              |                            | x                                        |                    |                          |
| CS 16 | x                                  |                               |                              |                            | x                                        |                    |                          |
| CS 17 | x                                  |                               |                              |                            | x                                        |                    |                          |
| CS 18 |                                    |                               | x                            |                            | x                                        |                    |                          |
| CS 19 |                                    | x                             |                              |                            | x                                        |                    |                          |
| CS 20 |                                    | x                             | x                            |                            | x                                        |                    |                          |
| CS 21 | x                                  | x                             |                              |                            |                                          |                    |                          |
| CS 22 |                                    |                               |                              |                            | x                                        |                    | x                        |
| CS 23 |                                    |                               |                              |                            | x                                        |                    | x                        |
| CS 24 |                                    |                               |                              |                            | x                                        |                    | x                        |
| CS 25 | x                                  |                               |                              |                            |                                          | x                  |                          |
| CS 26 |                                    |                               |                              |                            |                                          |                    |                          |
| CS 27 | x                                  |                               |                              |                            |                                          | x                  |                          |
| CS 28 |                                    |                               |                              |                            | x                                        | x                  | x                        |
| CS 29 | x                                  |                               |                              |                            | x                                        | x                  |                          |
| CS 30 |                                    |                               |                              |                            |                                          |                    | x                        |
| CS 31 |                                    |                               |                              |                            |                                          |                    |                          |
| CS 32 |                                    |                               |                              |                            |                                          |                    | x                        |
| CS 33 |                                    |                               |                              |                            |                                          |                    | x                        |
| CS 34 |                                    |                               |                              |                            |                                          | x                  | x                        |
| CS 35 |                                    |                               |                              |                            |                                          | x                  | x                        |
| CS 36 |                                    |                               |                              |                            |                                          |                    | x                        |
| CS 37 |                                    |                               |                              |                            |                                          |                    | x                        |
| CS 38 |                                    |                               |                              |                            |                                          |                    | x                        |
| CS 39 |                                    |                               |                              |                            |                                          |                    | x                        |
| CS 40 | x                                  |                               |                              |                            | x                                        |                    | x                        |
| CS 41 |                                    |                               |                              |                            |                                          |                    |                          |
| CS 42 |                                    | x                             |                              |                            |                                          |                    | x                        |

|       |   |   |
|-------|---|---|
| CS 43 |   | x |
| CS 44 | x | x |
| CS 45 | x | x |
| CS 46 | x | x |
| CS 47 | x | x |
| CS 48 |   | x |

**Table S4.** Case study database, section 4.

| No.  | Enabling conditions of applicability                                                                            | Hindering conditions of applicability                                                                            | Support from Financial service providers/intermediaries                                        | Support from Public/Philanthropic sector | References                                 |
|------|-----------------------------------------------------------------------------------------------------------------|------------------------------------------------------------------------------------------------------------------|------------------------------------------------------------------------------------------------|------------------------------------------|--------------------------------------------|
| CS1  | High credit rating;<br>Pipeline of investment-ready eligible projects;<br>Procurement criteria prioritising NBS | Low credit ratings;<br>Insufficient project size                                                                 | Certification, credit rating, verification                                                     | None                                     | Marsters et al. 2021                       |
| CS 2 | Alignment with government policy agenda<br>Pipeline of investment-ready eligible projects                       | Low credit rating; need for clear economic benefits;<br>Coordination of multiple parties, high transaction costs | Transaction structuring, credit rating, verification                                           | Credit enhancement                       | Iyer et al. 2018; Tirumala and Tiwari 2022 |
| CS 3 | Not mentioned                                                                                                   | Complex product with limited direct replicability                                                                | Transaction structuring, credit rating, verification                                           | Not mentioned                            | Tirumala and Tiwari 2022; NIB 2019         |
| CS 4 | High creditworthiness;<br>Credible certifications                                                               | Not mentioned                                                                                                    | Certification, third-party verification, credit rating                                         | Granting                                 | Marsters et al. 2021                       |
| CS 5 | Alignment with government policy agenda                                                                         | Lack of track record                                                                                             | Transaction structuring, financial advisory, third-party verification, performance measurement | Enabling legislation, granting           | Brand et al. 2021, Goldman Sachs (2016)    |
| CS 6 | High credit rating;<br>regulatory incentives                                                                    | Lack of pipeline of investment-ready projects;<br>Insufficient project size                                      | Transaction structuring, financial advisory, third-party verification, performance measurement | Granting, regulatory incentives          | Quantified Ventures 2023b; CBF 2023a, b.   |
| CS 7 | Alignment with government                                                                                       | Not mentioned                                                                                                    | Transaction structuring,                                                                       | Granting                                 | Quantified Ventures 2023a                  |

|       | policy agenda                                                                                                           |                                                                                                                                                         | financial<br>advisory, third-<br>party<br>verification,<br>performance<br>measurement          |                              |                                              |
|-------|-------------------------------------------------------------------------------------------------------------------------|---------------------------------------------------------------------------------------------------------------------------------------------------------|------------------------------------------------------------------------------------------------|------------------------------|----------------------------------------------|
| CS 8  | Single proxy metric (Volume of stormwater storage) across the different projects                                        | High uncertainty and transaction costs due to lack of track record                                                                                      | Transaction structuring, financial advisory, third-party verification, performance measurement | Granting                     | Quantified Ventures 2023c, Brand et al. 2021 |
| CS 9  | "Polluter pays" funds available through the deepwater horizon oil spill fund                                            | Changes in political preferences resulted in the interruption of the project                                                                            | Transaction structuring, financial advisory, third-party verification, performance measurement | Granting                     | EDF 2018                                     |
| CS 10 | Repayment structure matches the time horizon of benefit generation; Focus on measuring ESS with clear economic benefits | Lack of track record; Plurality of paying beneficiaries increase complexity and transaction costs; Trade off between precise measurement and ESS price. | Transaction structuring, financial advisory, third-party verification, performance measurement | Credit enhancement, granting | BFC 2017                                     |
| CS 11 | Community involvement and relationship-building                                                                         | Misalignment between financing cycle and restoration benefits; Difficulties in stakeholders coordination and standardisation complex systems            | Transaction structuring, third-party verification, performance measurement, certification      | Granting                     | Arjaliès, 2021                               |
| CS 12 | Use of proxy metric                                                                                                     | Difficulty in tracking number of individuals                                                                                                            | Transaction structuring, performance measurement,                                              | Granting                     | The Green Finance Institute 2023c            |

|       |                                                                                                                                                       |                                                                                                                                                                                       |                                                                                                     |                              |                                             |
|-------|-------------------------------------------------------------------------------------------------------------------------------------------------------|---------------------------------------------------------------------------------------------------------------------------------------------------------------------------------------|-----------------------------------------------------------------------------------------------------|------------------------------|---------------------------------------------|
|       |                                                                                                                                                       | varies from species to species                                                                                                                                                        | third-party verification                                                                            |                              |                                             |
| CS 13 | Not mentioned                                                                                                                                         | Arrangement complexity is a source of structural risk (risk mitigation and revenue generation tradeoff)                                                                               | Investment intermediary, transaction structuring, performance measurement, third party verification | Granting                     | Hall et al., 2017<br>Hall and Lindsay 2018  |
| CS 14 | Track record of social and environmental projects; Program diversification; Expertise in innovative finance mechanisms with private sector engagement | Trade-off between private corporate objectives and the non-profit interests; Building relations and policy change requires long time frames that are incompatible with some investors | Project aggregation, certification, transaction structuring, financial advisory                     | Granting, credit enhancement | Bath et al. 2020                            |
| CS 15 | Strong link between conservation and economic development                                                                                             | Country risks; Limited beneficiary payment capacity; Bureaucratic processes distancing stakeholders from project managers                                                             | Investment intermediary, transaction structuring, project aggregation                               | Granting                     | Gibbon 2017; Michaelowa et al. 2021         |
| CS 16 | Not mentioned                                                                                                                                         | Lack of track record; Projects are often early-stage and involve complex, multi-level systems of stakeholders                                                                         | Project aggregation, transaction structuring                                                        | Credit enhancement           | Green Finance Institute 2023b               |
| CS 17 | Not mentioned                                                                                                                                         | Lack of track record                                                                                                                                                                  | Project aggregation, transaction structuring, financial advisory,                                   | Granting, credit enhancement | Green Finance Institute 2023a<br>USAID 2021 |

|       |                                                                                                                                          | certification.                                                                                                                                                                     |                                            |                                |                                        |
|-------|------------------------------------------------------------------------------------------------------------------------------------------|------------------------------------------------------------------------------------------------------------------------------------------------------------------------------------|--------------------------------------------|--------------------------------|----------------------------------------|
| CS 18 | Plurality of monitoring instruments (local and remote)                                                                                   | Not mentioned                                                                                                                                                                      | Not mentioned                              | None                           | Booman et al. 2021, Howson et al. 2019 |
| CS 19 | Data-rich transactions; Plurality of monitoring instruments for both auditable and high resolution data.                                 | The integration of data requires specialised skills and instruments such as AI and Internet of Things                                                                              | Third-party verification                   | None                           | GainForest 2023, Kotsialou et al. 2021 |
| CS 20 | Smart contract structure is easily tailored to specific project needs                                                                    | Regulatory gaps; Monitoring and information verification delay rewards. Low stakeholders' digital literacy; long-term, integrated conservation is too complex for smart contracts. | Third-party verification                   | Granting                       | Mulley 2021, 2022                      |
| CS 21 | Not mentioned                                                                                                                            | Regulatory and policy gaps; lack of market maturity                                                                                                                                | Third-party verification                   | None                           | BIS 2022                               |
| CS 22 | Prepaid forward model, whereby payments for credits are made in advance and delivery is guaranteed. Integration of indigenous knowledge. | Not mentioned                                                                                                                                                                      | Standard setting, third-party verification | Granting                       | Solid World 2023                       |
| CS 23 | Governmental development offset framework                                                                                                | Not mentioned                                                                                                                                                                      | Transaction structuring                    | Regulatory incentive, granting | CommBank 2019                          |
| CS 24 | Not mentioned                                                                                                                            | Not mentioned                                                                                                                                                                      | Not mentioned                              | Not mentioned                  | Czura 2022                             |
| CS 25 | Operating costs                                                                                                                          | Contracting and                                                                                                                                                                    | Not                                        | Not                            | Bisaro and                             |

|       |                                                                                                                                             |                                                                                                                                                                           |                                                                                             |                                                 |                                           |
|-------|---------------------------------------------------------------------------------------------------------------------------------------------|---------------------------------------------------------------------------------------------------------------------------------------------------------------------------|---------------------------------------------------------------------------------------------|-------------------------------------------------|-------------------------------------------|
|       | represent a significant share of the overall costs.                                                                                         | tendering was time consuming and a learning process for all parties due to lack of experience in PPP.                                                                     | mentionedProje ct specification and supervision                                             | mentionedProje ct specification and supervision | Hinkel 2018<br>Tanis and Vergeer 2008     |
| CS 26 | Not mentioned                                                                                                                               | Not mentioned                                                                                                                                                             | Not mentioned                                                                               | Not mentioned                                   | Baroni et al. 2019<br>Brisbane City, 2018 |
| CS 27 | Specific enabling legislation enacted; Uncertainty related to new technology                                                                | Risks related to the large variability in coastal processes                                                                                                               | Financial advisory                                                                          | Enabling legislation                            | Ware and Banhalimi-Zakar 2017             |
| CS 28 | The relocation and compensation of companies operating on the site was managed with ample preparation time; Broad stakeholders involvement. | The great number of stakeholders involved delayed the realisation of the project. Initial lack of trust in the commitment of private partners to pursue wider co-benefits | Not mentioned                                                                               | Granting                                        | Climate Adapt 2016, Baroni et al. 2019    |
| CS 29 | Broad, periodic and digital public consultations; Integration of wider benefits within the financial limits of the project.                 | Social resistance to restoration                                                                                                                                          | Not mentioned                                                                               | Project specification and supervision           | Climate Adapt 2020b                       |
| CS 30 | Long-term research and community engagement background; Community-based model integrating education, employment                             | Wider-scale co-benefits are not captured yet; Unstable carbon credit prices; Insufficient project size to achieve economies of scale and global                           | Standard setting, transaction structuring, third-party verification, financial intermediary | Granting                                        | UNDP 2020, Wylie et al. 2016              |

|       |                                                                                                                                                                              |                                                                            |                                                                     |                      |                                        |
|-------|------------------------------------------------------------------------------------------------------------------------------------------------------------------------------|----------------------------------------------------------------------------|---------------------------------------------------------------------|----------------------|----------------------------------------|
|       | and training for carbon credit long-term sustainability                                                                                                                      | markets; Soil carbon and sea level rise not accounted for.                 |                                                                     |                      |                                        |
| CS 31 | Community-based model integrating education, employment and training for long-term sustainability                                                                            | Not mentioned                                                              | Standard setting, transaction structuring, third-party verification | None                 | Vanniarachchy 2020                     |
| CS 32 | Proven direct economic benefits of certifications. Broad stakeholders involvement                                                                                            | UN-REDD application for carbon credits dropped due to lengthy bureaucracy. | Standard setting, third-party verification                          | Not mentioned        | Wylie et al. 2016                      |
| CS 33 | Not mentioned                                                                                                                                                                | Incoherent policy framework                                                | Standard setting, third-party verification                          | Enabling legislation | Wylie et al. 2016                      |
| CS 34 | Development of ad hoc carbon crediting scheme for local offsetting; Alignment with government policy goals; Social acceptance and support; Broad stakeholders participation. | Not mentioned                                                              | Not mentioned                                                       | Granting             | Kuwae et al. 2022; Suehiro et al. 2020 |
| CS 35 | Local social acceptance and support; Broad stakeholders participation.                                                                                                       | Not mentioned                                                              | Not mentioned                                                       | Granting             | Kuwae et al. 2022                      |
| CS 36 | Dynamic carbon credit pricing (based on relative co-benefits) and flexible scheme for methodologies. Local social                                                            | Not mentioned                                                              | Transaction structuring, third-party verification                   | Granting             | Kuwae et al. 2022                      |

|       |                                                                                                                                                                       |                                                                                                                                                                                                          |                                                                                     |                                             |                                             |
|-------|-----------------------------------------------------------------------------------------------------------------------------------------------------------------------|----------------------------------------------------------------------------------------------------------------------------------------------------------------------------------------------------------|-------------------------------------------------------------------------------------|---------------------------------------------|---------------------------------------------|
|       | acceptance and support; Broad stakeholders participation.                                                                                                             |                                                                                                                                                                                                          |                                                                                     |                                             |                                             |
| CS 37 | Inclusion of soil carbon sequestration                                                                                                                                | The project was withdrawn due to large uncertainties in GHG sequestration estimates                                                                                                                      | Standard setting, transaction structuring, third-party verification                 | Granting                                    | Mack et al. 2022, Sapkota and White 2020    |
| CS 38 | Community-based model integrating education, employment and training for long-term sustainability                                                                     | Limited local capacity in environmental governance                                                                                                                                                       | Standard setting, transaction structuring, third-party verification                 | Granting                                    | VERRA 2021, Conservation International 2022 |
| CS 39 | Clear revenue streams (forestry sector)                                                                                                                               | Not mentioned                                                                                                                                                                                            | Certification, standard setting, transaction structuring, third-party verification  | None                                        | GPC 2021, MIRO 2022                         |
| CS 40 | Cheap labour costs. Inclusion of soil carbon sequestration.                                                                                                           | Several climate and anthropogenic pressures on restored areas. Sea level rise was not accounted for.                                                                                                     | Standard setting, transaction structuring, third-party verification                 | None                                        | Wylie et al. 2016                           |
| CS 41 | Investment in marketing of the Selva Shrimp label. Supportive role of Government passing new regulation for certified aquaculture and payments for ecosystem services | Uncertain landscape-level impact. Restoration is measured through proxy which is not descriptive of ecosystem health, and there is no horizontal collaboration among farmers to manage area-level risks. | Certification, third-party verification, financial advisory, financial intermediary | Granting, supervision, enabling legislation | Bottema 2019                                |
| CS 42 | Revenues used                                                                                                                                                         | Anthropogenic                                                                                                                                                                                            | None                                                                                | Granting,                                   | Benitez et al.                              |

|       |                                                                                                                                            |                                                                                                              |                                         |                                |                                                      |
|-------|--------------------------------------------------------------------------------------------------------------------------------------------|--------------------------------------------------------------------------------------------------------------|-----------------------------------------|--------------------------------|------------------------------------------------------|
|       | to reduce pressures on the ecosystems; Presence of Charismatic species; developed tourism sector. Price discrimination.                    | pressures on the ecosystems. Fees are not based on willingness-to-pay of the users, nor on management costs. |                                         | enabling legislation           | 2001                                                 |
| CS 43 | High willingness to pay                                                                                                                    | Stakeholders' opposition to optimisation of fees.                                                            | None                                    | Granting                       | Brenes Vega 2004                                     |
| CS 44 | High willingness to pay; Growing tourism sector                                                                                            | Not mentioned                                                                                                | Not mentioned                           | Enabling legislation           | Ministry of Business, innovation and employment 2023 |
| CS 45 | High willingness to pay; growing tourism sector.                                                                                           | Not mentioned                                                                                                | Not mentioned                           | Enabling legislation           | Prefeita Municipal de Bombinhas, 2013                |
| CS 46 | Clear, yet unequally distributed, recreational and risk mitigation values of restoration.                                                  | Instances of public resistance to increased taxation for coastal management.                                 | None                                    | Enabling legislation           | Mullin et al. 2018                                   |
| CS 47 | Broad stakeholder consultation and cooperation with local communities; Cost-benefit analysis demonstrated tourism revenues as co-benefits. | Tension between future budget uncertainties and need to repeat beach nourishment periodically.               | None                                    | Enabling legislation, granting | Climate Adapt 2020a                                  |
| CS 48 | Proof of increase of profit from the sale of certified products (market demand)                                                            | Market conditions limiting the promotion of sustainable ecosystem management. Possible trade-offs with other | Certification, third-party verification | Granting                       | Altmann and Berger Filho 2020                        |

---

productive  
activities carried  
out within the  
certified farm.

---

**Table S5.** Case study database, References.**REFERENCES**

- Altmann, A., Berger Filho, A. G., 2020 Certification and labeling for conservation of ecosystem services in the Pampa Biome: Case study of the Aliança do Pastizal scheme. *Ecosystem Services* 46 (2020) 1-7 <https://doi.org/10.1016/j.ecoser.2020.101209>
- Arjaliès, D.L., 2021. Deshkan Ziibi Conservation Impact Bond Project: On Conservation Finance, Decolonization, and Community- Based Participatory Research (No. 01), Deshkan Ziibi Conservation Impact Bond Project: On Conservation Finance, Decolonization, and Community-Based Participatory Research. Western University, London, Canada,. <https://doi.org/10.5206/101121ipib>
- Baroni, L., Whiteoak, K., Nicholls, G., 2019. Approaches to financing nature-based solutions in cities. [https://growgreenproject.eu/wp-content/uploads/2019/03/Working-Document\\_Financing-NBS-in-cities.pdf](https://growgreenproject.eu/wp-content/uploads/2019/03/Working-Document_Financing-NBS-in-cities.pdf)
- Bath, P., Guzmán-Valladares, A., Luján-Gallegos, V., Mathias, K., 2020. Conservation Trust Funds 2020: Global Vision, Local Action. Conservation Finance Alliance, New York. <https://www.conservationfinancealliance.org/10-year-review>
- Benitez, S., Drumm, A., Troya, R., 2001. Visitor use fees and concession systems in protected areas: Galápagos National Park Case Study (Technical Report No. 3), Ecotourism Program. The Nature Conservancy, Arlington, Virginia, USA.
- BFC, 2017. Fighting fire with finance. A roadmap for collective action. Blue Forest Conservation, Encourage Capital. <https://static1.squarespace.com/static/5e9a1c0d4e0c2e67582026f2/t/5f1b7a5533dc544479ee9dcf/1595636395891/FRB%2B2017%2BRoadmap%2BReport.pdf>
- BIS, 2022. Smart contract-based carbon credits attached to green bonds. Bank of International Settlements, Hong Kong monetary authority.
- Bisaro, A., Hinkel, J., 2018. Mobilizing private finance for coastal adaptation: A literature review. *WIREs Clim. Change* 9. <https://doi.org/10.1002/wcc.514>
- Booman, G., Craelius, A., Deriemaeker, B., Landua, G., Szal, W., Weinberg, B., 2021. Regen Network Whitepaper. Regen Network. <https://regen-network.gitlab.io/whitepaper/WhitePaper.pdf>
- Bottema, M.J.M., 2019. Institutionalizing area-level risk management: Limitations faced by the private sector in aquaculture improvement projects. *Aquaculture* 512, 734310. <https://doi.org/10.1016/j.aquaculture.2019.734310>
- Brand, M.W., Quesnel Seipp, K., Saksa, P., Ulibarri, N., Bomblies, A., Mandle, L., Allaire, M., Wing, O., Tobin-de la Puente, J., Parker, E.A., Nay, J., Sanders, B.F., Rosowsky, D., Lee, J., Johnson, K., Gudino-Elizondo, N., Ajami, N., Wobbrock, N., Adriaens, P., Grant, S.B., Wright, S., Gartner, T., Knight, Z., Gibbons, J.P., 2021. Environmental Impact Bonds: a common framework and looking ahead. *Environ. Res. Infrastruct. Sustain.* 1, 023001. <https://doi.org/10.1088/2634-4505/ac0b2c>
- Brenes Vega, E., 2004. Sustainable Finance of Protected Areas: Tourism Based User Fees Conservation Finance Guide, Conservation Finance Alliance. SSRN Electron. J. <https://doi.org/10.2139/ssrn.2013199>
- Brisbane City, 2018. Oxley Creek Transformation Master Plan. <https://www.sustainablebrisbane.com.au/app/uploads/2021/11/Oxley-Creek-Transformation-Master-Plan-2018.pdf>

CBF 2023a. Environmental Impact Bonds <https://www.cbf.org/how-we-save-the-bay/programs-initiatives/environmental-impact-bonds-eib.html> (Accessed on 06.07.2023)

---

CBF 2023b. Environmental Impact Bonds: Lessons learned in the Chesapeake Bay <https://www.cbf.org/document-library/cbf-guides-fact-sheets/expanded-eib-lessons-learned-brief.pdf> (Accessed on 06.06.2023)

---

Climate Adapt, 2016. Public-private partnership for a new flood proof district in Bilbao. <https://climate-adapt.eea.europa.eu/en/metadata/case-studies/public-private-partnership-for-a-new-flood-proof-district-in-bilbao> (Accessed on 06.06.2023)

---

Climate Adapt, 2020a. Addressing coastal erosion in Marche region, Italy. <https://climate-adapt.eea.europa.eu/en/metadata/case-studies/addressing-coastal-erosion-in-marche-region-italy> (Accessed on 10.06.2023)

---

Climate Adapt, 2020b. Regional flood management by combining soft and hard engineering solutions, the Norfolk Broadlands. <https://climate-adapt.eea.europa.eu/en/metadata/case-studies/regional-flood-management-by-combining-soft-and-hard-engineering-solutions-the-norfolk-broadlands> (Accessed on 10.06.2023)

---

Commbank, 2019. Blockchain “BioTokens” create new marketplace for biodiversity. <https://www.commbank.com.au/guidance/newsroom/blockchain-biotokens-biodiversity-marketplace-201908.html> (Accessed on 03.09.2023)

---

Conservation International, 2022. Vida Manglar – 2022 Impact Report. [https://www.conservation.org/docs/default-source/publication-pdfs/cispata-bay-mangroves-2022-impact-report.pdf?sfvrsn=2b5b6f4d\\_3](https://www.conservation.org/docs/default-source/publication-pdfs/cispata-bay-mangroves-2022-impact-report.pdf?sfvrsn=2b5b6f4d_3)

---

Czura, C., 2022. Blockchain for Biodiversity Finance: an overview of various blockchain applications to help increase biodiversity funding. United Nations Environmental Program

---

EDF, 2018. Financing resilient communities and coastlines: How environmental impact bonds can accelerate wetland restoration in Louisiana and beyond. EDF, New York.

---

F. Suehiro, H. Suzuki, S. Yoshihara, et al., Study on the world’s first credit certification for blue carbon in eelgrass fields in Yokohama City, J. JSCE G3 76 (2020) 49–53

---

GainForest, 2023. GainForest Whitepaper. Available at: <https://docs.gainforest.earth/whitepaper/chapter-zero>

---

Gibbon, A., 2017. Innovations in conservation finance – Althelia. Available at: <https://www.tropicalforests.ox.ac.uk/wp-content/uploads/sites/2/2017/09/Adam-Gibbon-presentation.pdf>

---

Goldman Sachs, 2016. FACT SHEET: DC Water Environmental Impact Bond. Available at: <https://www.goldmansachs.com/media-relations/press-releases/current/dc-water-environmental-impact-bond-fact-sheet.pdf>

---

GPC, 2021. A Market Review of Nature-Based Solutions. Green Purposes Company, Finance Earth. Available at: <https://finance.earth/wp-content/uploads/2021/05/Finance-Earth-GPC-Market-Review-of-NbS-Report-May-2021.pdf>

---

Green Finance Institute, 2023a. The Meloy Fund. <https://www.greenfinanceinstitute.co.uk/gfihive/case-studies/the-meloy-fund/> (Accessed on 09.11.2023)

---

- 
- Green Finance Institute, 2023b. Althelia Sustainable Ocean Fund.  
<https://www.greenfinanceinstitute.co.uk/gfihive/case-studies/sustainable-ocean-fund/>  
 (Accessed on 09.11.2023)
- 
- Green Finance Institute 2023c The Rhino Bond  
<https://www.greenfinanceinstitute.com/gfihive/case-studies/the-wildlife-conservation-bond-the-rhino-bond/> (Accessed on 09.11.2023)
- 
- Hall, D., Lindsay, S., 2018. Climate finance landscape for Aotearoa New Zealand: A preliminary survey (Report Prepared for the Ministry for the Environment). Mohio, Auckland.
- 
- Hall, D., Lindsay, S., Judd, S., 2017. Permanent Forest Bonds: A pioneering environmental impact bond for Aotearoa New Zealand (Working Paper No. 17/01), Working Papers. Victoria University of Wellington - Institute for Governance and Policy Studies, Wellington, New Zealand
- 
- Howson P., Oakes S., Baynham-Herd Z., Swords J., 2019 Cryptocarbon: The promises and pitfalls of forest protection on a blockchain. *Geoforum* 100, pp. 1-9  
<https://doi.org/10.1016/j.geoforum.2019.02.011>
- 
- Iyer, V., Mathias, K., Meyers, D., Victorine, R., Walsh, M., 2018. Finance tools for coral reef conservation: A guide. 50 Reefs, Wildlife Conservation Society, Conservation Finance Alliance.
- 
- Kotsialou, G., Kuralbayeva, K., Laing, T., 2021. Forest carbon offsets over a smart ledger. <https://dx.doi.org/10.2139/ssrn.3945521>
- 
- Kuwae, T., Watanabe, A., Yoshihara, S., Suehiro, F., Sugimura, Y., 2022. Implementation of blue carbon offset crediting for seagrass meadows, macroalgal beds, and macroalgae farming in Japan. *Mar. Policy* 138  
<https://doi.org/10.1016/j.marpol.2022.104996>
- 
- Mack, S.K., Lane, R.R., Holland, K., Bauer, J., Cole, J., Cowan, R., 2022. A blue carbon pilot project: Lessons learned. *Carbon Manag.* 13, 420–434.  
<https://doi.org/10.1080/17583004.2022.2112292>
- 
- Marsters, L., Morales, G., Ozment, S., Silva, G., Watson, G., Netto, M., Frisari, G.L., 2021. Nature-based Solutions in Latin-America and the Caribbean Financing Mechanisms for Regional Replication. Inter-American Development Bank and World Resources Institute, Washington D.C.
- 
- Michaelowa, A., Hoch, S., Weber, A.-K., Kassaye, R., Hailu, T., 2021. Mobilising private climate finance for sustainable energy access and climate change mitigation in Sub-Saharan Africa. *Clim. Policy* 21, 47–62. <https://doi.org/10.1080/14693062.2020.1796568>
- 
- Ministry of Business, Innovation & Employment, 2023. International Visitor Conservation and Tourism Levy (IVL) – Annual Performance Report 2021/22. Available at: <https://www.mbie.govt.nz/immigration-and-tourism/tourism/tourism-funding/international-visitor-conservation-and-tourism-levy/ivl-annual-performance-reports/annual-performance-report-202122/>
- 
- MIRO 2022 - 2022 Annual report. Available at: [https://www.miroforestry.com/wp-content/uploads/2023/05/Miro\\_Annual-Report\\_2022\\_V5-Web.pdf](https://www.miroforestry.com/wp-content/uploads/2023/05/Miro_Annual-Report_2022_V5-Web.pdf)
- 
- Mulley, B., 2021. Introducing the FLRChain. Gaiachain Lab.  
<https://medium.com/gaiachain/introducing-the-flrchain-6a80aef97f9c> (Accessed 08.07.2023)
-

---

Mulley, B., 2022. Blockchain & Forest Landscape Restoration: Lessons learned and next steps. Gaiachain Lab. <https://medium.com/gaiachain/blockchain-forest-restoration-lessons-learned-so-far-d68756a8e32a> (Accessed 08.07.2023)

---

Mullin, M., Smith, M.D., McNamara, D.E., 2018. Paying to save the beach: effects of local finance decisions on coastal management. *Clim. Change* 152, 275–289. <https://doi.org/10.1007/s10584-018-2191-5>

---

NIB, 2019. Baltic Blue Bond - Additional focus/finance on Blue Economy. Blue Economy Investment Opportunities for Baltic Sea Solutions, 13 June 2019. Available at: [https://strategyforum2019.pomorskie.eu/wp-content/uploads/2023/01/4.-NIB\\_Tiina-Salonen\\_presentation\\_20190613\\_clean.pdf](https://strategyforum2019.pomorskie.eu/wp-content/uploads/2023/01/4.-NIB_Tiina-Salonen_presentation_20190613_clean.pdf)

---

Prefeita Municipal de Bombinhas, 2013. Lei Complementar 185 2013 de Bombinhas SC. <https://leismunicipais.com.br/a/sc/b/bombinhas/lei-complementar/2013/19/185/lei-complementar-n-185-2013-institui-a-taxa-de-preservacao-ambiental-tpa-e-da-outras-providencias> (Accessed on 07.07.23).

---

Quantified Ventures, 2023a. Equitable Green Infrastructure in Buffalo, NY <https://www.quantifiedventures.com/buffalo-eib> (Accessed on 28.04.2023).

---

Quantified Ventures, 2023b. Hampton, VA: An Environmental Impact Bond to Fight Flooding <https://www.quantifiedventures.com/hampton-eib> (Accessed 28.04.2023)

---

Quantified Venture, 2023c. Atlanta: First Publicly Offered Environmental Impact Bond <https://www.quantifiedventures.com/atlanta-eib> (Accessed on 28.04.2023)

---

Sapkota, Y., White, J.R., 2020. Carbon offset market methodologies applicable for coastal wetland restoration and conservation in the United States: A review. *Sci. Total Environ.* 701, 134497. <https://doi.org/10.1016/j.scitotenv.2019.134497>

---

Solid World, 2023. Vlinder papariko. <https://app.solid.world/projects/4> (Accessed on 25.06.2023)

---

Tirumala, R.D., Tiwari, P., 2022. Innovative financing mechanism for blue economy projects. *Mar. Policy* 139, 104194. <https://doi.org/10.1016/j.marpol.2020.104194>

---

UNDP, 2020. Mikoko Pamoja, Kenya, Equator Initiative Case Study Series. UNDP, Equator Initiative, New York, USA. Available at: <https://www.equatorinitiative.org/wp-content/uploads/2020/03/Mikoko-Pamoja-Kenya.pdf>

---

Vanniarachchy, S.A., 2020. Mangrove restoration and sustainable development in Myanmar. Worldview International Foundation.

---

VERRA, 2021. Blue carbon project Gulf of Morrosquillo “Vida Manglar.” <https://registry.verra.org/app/projectDetail/VCS/2290> (Accessed on 26.08.2023)

---

Ware, D., Banhalimi-Zakar, Z., 2017. Funding coastal protection in a changing climate: Lessons from three projects in Australia (Discussion Paper), ACCARNSI discussion papers. Australian Climate Change Adaptation Research Network for Settlements and Infrastructure.

---

Tanis, M., & Vergeer, T. (2008). Long-term coastal defence and management at Pevensey Bay, UK: A public private partnership. *Terra et Aqua Journal*, 113,14–18.

---

The World Bank, 2022 Wildlife Conservation Bond Boosts South Africa’s Efforts to Protect Black Rhinos and Support Local Communities. Press release No. 2022/059/AFE. <https://www.worldbank.org/en/news/press-release/2022/03/23/wildlife-conservation-bond-boosts-south-africa-s-efforts-to-protect-black-rhinos-and-support-local->

---

---

communities (Accessed on 09.11.2023)

---

USAID 2021 Catalyzing private finance for climate action: case study analysis.

Available at: <https://www.usaid.gov/documents/catalyzing-private-finance-climate-action-case-study-analysis>

---

Wylie, L., Sutton-Grier, A.E., Moore, A., 2016. Keys to successful blue carbon projects: Lessons learned from global case studies. Mar. Policy 65, 76–84.

<https://doi.org/10.1016/j.marpol.2015.12.020>

---
